# Supplementary material
Source: Research Square preprint supplement (doi:10.21203/rs.3.rs-10125006/v1)
Supplement: Supplementary file 1 [file 4f5692b1090c4b9ee8f1abc1.docx]

# Supplementary material

*Supplement to “The name-collision burden of name-based author attribution is unequal across name origins: a measurement in OpenAlex, and an identifier-based remedy (SigmaCV)”.*

Sections are numbered in order of first reference in the main text: (S1) the matching-operator specification (Section 2.2); (S2) the regression tables, diagnostics, and goodness-of-fit (Section 2.3); (S3) practice recommendations (Section 2.7); (S4) the full tool comparison (Section 4.1); (S5) the heuristic usability evaluation (Section 4.3); (S6) the worked examples (Section 4.4); and (S7) the extended data-protection detail (Section 5). The analysis pipeline is openly available in the project repository (see the main paper’s Declarations).

## S1. Matching operator: precise specification

This expands the operator summary in Section 2.2 and is stated so the measurement is reproducible independently of our code.

Author entities are first deduplicated by OpenAlex author identifier. A name is normalized by lower-casing it, folding accented letters to their unaccented base form, collapsing any run of whitespace to a single space, and trimming; tokens are kept in their printed order, and hyphens, apostrophes, and name particles (for example “van”, “de”) are preserved as written. The normalized full name is this string; the initial form is the first character of the normalized name followed by its final whitespace-delimited token, that token taken as the surname (a single-token name is its own initial form). Names shorter than three characters after normalization are excluded. The full-name and ORCID-restricted counts aggregate on the normalized full name; the initial-form count aggregates on the initial form.

Taking the printed form as written has two consequences, both of which make the operator conservative. Because tokens are not reordered, a record printed family-name-first (as some romanized East-Asian names are) yields a different initial form than the same name printed given-name-first; and because hyphens and alternative romanizations are preserved rather than canonicalized, one underlying name written two ways is split across two normalized strings. Both effects split what is really a single colliding name across several strings and so under-count collisions; neither inflates them.

## S2. Regression tables

All models are fit over the entire eligible population (N = 4,634,707 ORCID-bearing authors: East Asian 1,481,991, Anglophone 1,661,178, Other 1,491,538), with Anglophone as the reference stratum. We report each model on the natural (log) scale (coefficient estimate and standard error) and as an incidence-rate ratio, IRR = exp(estimate), with a 95% confidence interval.

**Standard errors.** Because the counts are heavily overdispersed (below), the model-based Poisson standard errors are anti-conservative, so for the Poisson models we report both the model-based error and a **heteroskedasticity-consistent (HC0 sandwich) robust standard error**, and we form the 95% confidence intervals from the robust errors. The robust errors are roughly an order of magnitude larger than the model-based ones and are the appropriate ones to read; even so, at this population size the intervals remain narrow, so the IRRs are precisely estimated as parameters of the fitted model (which is not the same as being free of model or construct uncertainty, Section 2.2). The negative-binomial errors already account for overdispersion through the dispersion parameter theta.

**Model choice.** The collision counts are heavily overdispersed: the Pearson dispersion of the Poisson fit ranges from about 275 (ORCID-restricted) to over 23,000 (initial-form), far above the Poisson value of 1. We therefore prefer the negative binomial, whose Akaike Information Criterion (AIC) is far lower (for example 2.7 x 10^7 versus 2.9 x 10^8 for the ORCID-restricted metric) and whose dispersion is much closer to 1. The negative-binomial and Poisson point estimates for the East-Asian incidence-rate ratio nonetheless agree closely (8.61 versus 8.64, 7.94 versus 7.99, and 6.53 versus 6.51 across the three metrics), as expected given the shared log-mean structure; the two models differ in how they treat dispersion, not in the fitted ratios.

### Table S1. Productivity-adjusted models: count ~ stratum + log(1 + works)

For each metric the table gives the Poisson coefficients (estimate, model-based SE, robust HC0 SE, IRR, and the robust 95% CI); the negative-binomial fit and the likelihood and pseudo-R-squared statistics follow each table. All models are fit over the full population (N = 4,634,707); the likelihood-ratio test is against the intercept-only model (df 3).

**ORCID-restricted count.**

| Term | Estimate | Model SE | Robust SE | IRR | Robust 95% CI |
| --- | --- | --- | --- | --- | --- |
| Intercept | 1.580 | 0.0004 | 0.0081 | 4.856 | [4.779, 4.933] |
| East Asian | 2.153 | 0.0004 | 0.0065 | 8.613 | [8.505, 8.723] |
| Other | −1.031 | 0.0007 | 0.0091 | 0.357 | [0.351, 0.363] |
| log(1 + works) | 0.021 | 0.0001 | 0.0017 | 1.021 | [1.018, 1.025] |

*Poisson: McFadden pseudo-R² 0.251, log-likelihood −1.458 x 10^8, LR vs null 9.77 x 10^7 (p < 0.001), residual deviance 2.79 x 10^8 (df 4,634,703), AIC 2.92 x 10^8, Pearson dispersion 275.4. Negative binomial: IRR (East Asian) 8.643 [8.613, 8.672], theta 0.452, log-likelihood −1.335 x 10^7, McFadden pseudo-R² 0.091, AIC 2.67 x 10^7, Pearson dispersion 18.2.*

**Full-name entity count.**

| Term | Estimate | Model SE | Robust SE | IRR | Robust 95% CI |
| --- | --- | --- | --- | --- | --- |
| Intercept | 2.803 | 0.0002 | 0.0091 | 16.49 | [16.20, 16.79] |
| East Asian | 2.072 | 0.0002 | 0.0074 | 7.942 | [7.828, 8.059] |
| Other | −1.149 | 0.0004 | 0.0113 | 0.317 | [0.310, 0.324] |
| log(1 + works) | −0.022 | 0.0000 | 0.0017 | 0.978 | [0.975, 0.982] |

*Poisson: McFadden pseudo-R² 0.244, log-likelihood −4.088 x 10^8, LR vs null 2.64 x 10^8 (p < 0.001), residual deviance 8.03 x 10^8, AIC 8.18 x 10^8, Pearson dispersion 1016.8. Negative binomial: IRR (East Asian) 7.993 [7.964, 8.022], theta 0.369, log-likelihood −1.683 x 10^7, McFadden pseudo-R² 0.064, AIC 3.37 x 10^7, Pearson dispersion 25.7.*

**Initial-form count.**

| Term | Estimate | Model SE | Robust SE | IRR | Robust 95% CI |
| --- | --- | --- | --- | --- | --- |
| Intercept | 7.697 | 0.00002 | 0.0037 | 2201 | [2185, 2217] |
| East Asian | 1.877 | 0.00002 | 0.0031 | 6.534 | [6.494, 6.574] |
| Other | −0.329 | 0.00003 | 0.0041 | 0.720 | [0.714, 0.726] |
| log(1 + works) | −0.038 | 0.00001 | 0.0008 | 0.963 | [0.962, 0.965] |

*Poisson: McFadden pseudo-R² 0.304, log-likelihood −2.516 x 10^10, LR vs null 2.19 x 10^10 (p < 0.001), residual deviance 5.03 x 10^10, AIC 5.03 x 10^10, Pearson dispersion 23,044.8. Negative binomial: IRR (East Asian) 6.509 [6.481, 6.537], theta 0.264, log-likelihood −3.700 x 10^7, McFadden pseudo-R² 0.015, AIC 7.40 x 10^7, Pearson dispersion 2.59.*

### Table S2. Field- and career-adjusted models: count ~ stratum + log(1 + works) + field + career

Poisson fit (the negative-binomial maximum likelihood did not converge with the 20-level field factor; at population scale the Poisson log-mean coefficients are the population conditional-mean ratios regardless of the variance model). Field is the top-scored level-0 OpenAlex concept (20 levels, reference Medicine, known for 98% of the population); career is years since first publication. Only the stratum, productivity, and career terms are shown; the 19 field coefficients are in the released model output.

| Metric | East Asian IRR [95% CI] | Other IRR [95% CI] | log-works IRR | career IRR | Pearson dispersion |
| --- | --- | --- | --- | --- | --- |
| ORCID-restricted | 7.802 [7.797, 7.808] | 0.356 [0.356, 0.357] | 1.076 | 0.994 | 265.1 |
| Full-name | 7.331 [7.328, 7.334] | 0.322 [0.321, 0.322] | 0.963 | 1.002 | 951.1 |
| Initial-form | 6.149 [6.149, 6.149] | 0.691 [0.691, 0.691] | 1.003 | 0.994 | 24,187.7 |

Adding field and career shrinks the East-Asian incidence-rate ratio only modestly relative to the productivity-only models in Table S1 (from 8.61, 7.94, 6.53 to 7.80, 7.33, 6.15), and the career coefficient is essentially null (an IRR within 0.6% of 1 per year). Field composition therefore accounts for a small part of the gap; the bulk survives.

### Robustness: deduplicating by ORCID string

The ORCID-restricted count is, strictly, a count of distinct ORCID-bearing author *entities* sharing a name, which equals the number of distinct real people only if each person contributes exactly one such entity; the main way that could fail is one real person split across several ORCID-bearing entities, which would inflate the count. We recomputed the metric deduplicating by **distinct ORCID iD string** rather than by OpenAlex author entity. The result is materially unchanged: the East-Asian median stays 3 (versus 1 for both comparison strata), the IQR (1 to 17) and 90th percentile (108) are identical, the share colliding with at least 100 moves only from 10.46% to 10.44%, and the rank-biserial effect sizes are unchanged (r = −0.49 versus Anglophone, −0.55 versus Other). OpenAlex therefore assigns ORCIDs close to one-to-one with entities even for the exposed population.

## S3. Implications for practice

The measurement (Section 2) has direct implications for anyone running name-based author analyses. We state them as recommendations grounded in the reported figures rather than as universal rules.

- **Initials alone are not a defensible attribution basis.** Initial + surname is the worst-case strategy measured here; for some name origins it collides a single researcher with hundreds of identities, so an initials-only join cannot reliably separate them at any scale.
- **If you must use names, condition on more than the name.** Co-authors, venue, year, and affiliation are the auxiliary signals the disambiguation literature is built on; a raw name join discards exactly the context that makes name-based attribution tractable.
- **Prefer pre-disambiguated author identifiers, and say which you used.** ORCID and the OpenAlex, Scopus, and Web of Science author IDs already resolve most of this burden; report the identifier system relied on so the attribution basis is auditable.
- **Disaggregate author-level results by name origin, or at minimum flag the weakness.** Where disaggregation is not possible, treat romanized-name coverage as a stated, known limitation rather than an invisible one.
- **Treat any name-based or name-to-demographic inference as differentially unreliable.** Such inference misrecognizes unequally across name origins (Lockhart et al., 2023), so its error is itself a source of inequity, not a uniform nuisance.

## S4. Full tool comparison

The full version of Table 2 (Section 4.1). Column meanings are as in Table 2; the comparison records the presence of a capability from public documentation, not its quality or performance.

| Tool | Category | Open / free to individual | ID-anchored | Multi-source | Styled CV export | Living page | FAIR out | Individual-controlled |
| --- | --- | --- | --- | --- | --- | --- | --- | --- |
| **SigmaCV** | CV / profile builder | Yes / yes | Yes | Yes (8+ types) | PDF, DOCX, LaTeX, MD, BibTeX, CSL-JSON | Yes | Yes (JSON-LD, OAI-PMH, RO-Crate) | Yes |
| ORCID | Identifier registry | Yes / yes | Yes | Partial (claimed) | No (data record) | Public record | Partial (API) | Yes |
| OpenAlex | Identifier + database | Yes / yes | Yes | Publications, metrics | No (API/data) | No | Partial (API) | No |
| Scopus Author ID | Identifier + profile | No / no | Yes | Scopus only | No | Profile (Scopus) | No | No |
| Web of Science ResearcherID | Identifier + profile | No / no | Yes | WoS only | No | Profile (WoS) | No | Partial |
| VIVO | Institutional RIM | Yes / institution-hosted | Yes | Yes (institutional) | No (linked data) | Institutional page | Yes (RDF) | No |
| Symplectic Elements / Pure | Institutional RIM/CRIS | No / no | Yes | Yes (institutional) | Reports / limited | Institutional page | Partial | No |
| Google Scholar profile | Individual profile | Yes / yes | No (name-based) | Scholar only | No | Profile page | No | Yes |
| Manubot | Document pipeline | Yes / yes | Yes (cite-by-ID) | No (author-supplied) | Multi-format docs | No | Partial | Yes |
| moderncv / JSON Resume | CV format / template | Yes / yes | No | No (manual) | Yes (typeset / themed) | No | No | Yes |
| HugoBlox academic site | Site builder | Yes / yes | Partial (import) | Partial (import) | Website | Website (manual) | Partial | Yes |

## S5. Full heuristic usability evaluation

Nielsen’s ten usability heuristics, applied to the authenticated editor, the publish and share flow, and the account and consent surfaces (Section 4.3). Observations are grounded in the application’s components and user-facing strings; severities use Nielsen’s 0–4 scale.

**1. Visibility of system status.** Satisfied: a persistent live region announces Saved / Saving… / Synced / Sync failed with a colour-coded dot; long actions disable their trigger and swap the label (Exporting…, Syncing…, Signing in…); the preview shows “Rendering preview…” during the debounced re-render; a sync-report banner makes the living-CV behaviour observable (last sync, new, to review). Shortfall: auto-save is silent between keystroke and the debounced write (only the Save button enabling and a generic page-leave guard signal unsaved work); template galleries show bare skeletons with no loading or failed text.

**2. Match with the real world.** Satisfied: labels use the academic user’s language (Not mine / Mine, Re-sync, Selected publications, Most cited first); provenance uses real source names; citation styles and metrics use domain vocabulary (APA/IEEE/Nature, h-index, FWCI) with DORA/Leiden framing. Shortfall: some app-coined terms (Hide vs Hide-from-view, Mascot companion, the genre style names) are not self-evident until a tooltip or thumbnail is seen.

**3. User control and freedom.** Satisfied (a core strength): curation is non-destructive and reversible: Not mine / Hide keep the work on file, source-derived edits expose a Revert, duplicate resolution never auto-removes, applying a layout snapshots a restorable preset; popovers close on Escape, outside-click, and an explicit close; the one destructive action (Delete account) is behind a focus-trapped confirmation. Shortfall: no global undo/redo (every action commits and autosaves immediately); removing a manual entry has no confirmation and no Revert.

**4. Consistency and standards.** Satisfied: interaction patterns recur across sections; menus share one popover implementation; ARIA patterns are followed (tabs keyboard model, dialog popovers holding form fields, focus-trapped modals). Shortfall (internal inconsistency): the review-signal vocabulary is overloaded: one “review” badge maps to three distinct conditions, and resolution verbs differ by path (Show / Keep hidden vs Yes-it’s-mine / not-mine vs Keep-this-one / Keep-all).

**5. Error prevention.** Satisfied: inputs are constrained (publication limit clamped, numeric year fields, character counters); the DOI-claim flow previews the work and disables Add until a self-author is chosen; publishing is staged and shows what it exposes before the toggle flips, with contact fields opt-in and off by default. Shortfall: email, phone, website, and the structured-entry DOI are free text with no inline format validation before save; a Mascot set on a mascot style becomes silently inert on a non-mascot style.

**6. Recognition rather than recall.** Satisfied (a strong area): styles, fonts, page formats, templates, public styles, metrics, and layout presets are live-preview pickers (templates show the user’s own CV); current state is shown beside each control; the “needs your attention” panel surfaces curation debt as counts with jump-to-item. Shortfall: the visibility-options group is many checkboxes, several without an adjacent hint; there is no global search across the whole CV (bulk filter is per-section and only at five or more items).

**7. Flexibility and efficiency.** Satisfied: bulk curation with filtering, saved views, one-click layout presets, a multi-format export control grouped sensibly, keyboard submit, drag plus accessible move-button fallback, persisted preferences, and an onboarding sequencer showing one prompt at a time. Shortfall: no keyboard accelerators for Save/Re-sync/Export; the overlapping visibility mechanisms are powerful but costly for occasional users; bulk mode gated at five items.

**8. Aesthetic and minimalist design.** Satisfied: the top bar is one calm row with a single primary action; destructive and data-protection controls are collapsed into the Account menu; heavy public-page styling never reaches the document exports; a crowding note appears once several metrics are selected. Shortfall: the visibility-options group is dense; an expanded publication row can show title, meta, up to five badges, a reason select, a compare panel, and a long action row at once.

**9. Help users recover from errors.** Satisfied: error states are specific and actionable: the sync-failure state names the likely cause, offers a retry, and is distinguished from “no CV yet”; the auth error page maps codes to friendly copy; optimistic toggles visibly revert and announce failure. Shortfall: the live preview fails silently on a render error; thumbnail and clipboard-copy failures are swallowed without feedback.

**10. Help and documentation.** Satisfied: inline just-in-time help is pervasive: an editor tip line, a one-time disambiguation coachmark, writing prompts, tooltips on most non-obvious toggles, and outbound links to DORA, the Leiden Manifesto, and Seglen 1997. Shortfall: no consolidated help inside the editor; much critical help lives only in title tooltips (invisible to touch and some assistive technology).

### Table S3. Consolidated usability findings (Nielsen severity 0–4)

| # | Heuristic | Issue | Severity | Mitigated? |
| --- | --- | --- | --- | --- |
| 1 | User control & freedom | No global undo/redo; every action commits and autosaves immediately. | 3 | Partly (curation non-destructive; source edits revertible) |
| 2 | User control & freedom | Deleting a manual entry is immediate, no confirmation, no Revert. | 2 | No |
| 3 | Consistency & standards | One “review” badge denotes three conditions; resolution verbs differ by path. | 3 | Partly (tooltips; health panel separates) |
| 4 | Error recovery | Live preview fails silently; user may edit against a stale render. | 3 | No |
| 5 | Recognition; Flexibility | No global search/filter; bulk filter per-section and only at ≥5 items. | 2 | Partly (health panel jump-to-item) |
| 6 | Minimalist; Recognition | Visibility group is ~15 checkboxes + notes; some lack adjacent hints. | 2 | Partly (collapsible group; some tooltips) |
| 7 | Match real world; Flexibility | Overlapping visibility models (Hide / Hide-from-view / Featured / peer-reviewed-only). | 2 | Partly (scope hints) |
| 8 | Error prevention | Email/phone/website/URL and DOI free text, no inline validation before save. | 2 | Partly (semantic input types) |
| 9 | Visibility of status | No explicit unsaved-changes indicator beyond Save enabling. | 2 | Partly (page-leave guard, post-save status) |
| 10 | Visibility; Error recovery | Thumbnail galleries show blank skeletons on slow/failed fetch. | 1 | Partly (skeleton; preview pane authoritative) |
| 11 | Error recovery | Clipboard-copy failures silently ignored in Share/Publish. | 1 | No |
| 12 | Help & documentation | No consolidated in-editor help; help lives in title tooltips. | 2 | Partly (coachmark, hints, tooltips) |
| 13 | Match real world | App-coined terms carry no meaning until a tooltip/thumbnail is seen. | 1 | Partly (tooltips/thumbnails) |
| 14 | Error prevention | Mascot set then switching to a non-mascot style silently makes it inert. | 1 | No |

No issue reaches severity 4: the one irreversible action (account deletion) is well guarded, and the most error-prone curation actions cannot lose data.

**Notable strengths.** Non-destructive, reversible curation as a design principle; the “needs your attention” health panel; recognition-driven styling (live-previewed pickers showing the user’s own CV); robust, accessible modal and popover handling (focus trapping, a click-catching scrim over the preview iframe, a skip link); honest, specific error and empty states with self-reverting optimistic toggles; and responsible-metrics framing built into the interaction (default none, a DORA/Leiden nudge, a crowding caution, field-normalised indicators linked to sources).

## S6. Worked examples

These illustrate the mechanism summarised in Section 4.4 on two real, consenting records.

We illustrate the pipeline end to end with the first author’s own record (ORCID 0000-0002-7483-2489). Signing in with ORCID, SigmaCV resolves the associated OpenAlex author identifiers and assembles a single CV that draws publications and metrics from OpenAlex with Crossref gap-fill, the profile and claimed works from ORCID, and datasets and software from DataCite and OpenAIRE, deciding ownership by identifier throughout. The accented family name “Chrétien” is highlighted correctly on the author’s own works because the highlight keys on the identifier rather than on the string, which a name-based highlighter would mishandle through accent-folding or abbreviation. The curated record exports identically across formats from the one canonical object and can be published as a living page that re-syncs from the open sources.

A second worked example, contributed with the colleague’s consent, makes the equity case concrete on exactly the kind of name Section 2 finds most exposed. Xueqin Huang (ORCID 0000-0001-6866-9091) is a researcher affiliated in Japan (Nagoya City University and Nagoya University). On the same March 2026 snapshot, her printed name “Xueqin Huang” is shared by 22 distinct OpenAlex author entities, of which 10 carry an ORCID (a lower bound of 10 distinct real people sharing the name); the initialized form “X. Huang” that a citation style would print collides with 10,825 identities. A name-based assembler would have to separate her work from up to ten thousand namesakes, and OpenAlex itself already records her under an initialized alternative name (“X. X. Huang”). SigmaCV instead resolves her ORCID to her OpenAlex author identifier and assembles only the works linked to it, each by a persistent identifier, so neither the 22-entity full-name pool nor the 10,825-identity initial-form pool affects what appears on her CV; the self-name highlight bolds “Huang” only on her own works because it keys on the identifier rather than the string. Because her works span more than one field, they are also the kind of record where OpenAlex over-merge is most likely, so any work the upstream entity wrongly absorbed would surface under the misattribution flag of Section 3 for her to confirm or dismiss rather than being silently trusted.

## S7. Extended data-protection detail

This expands the concise statement in Section 5.

**Lawful bases.** Assembling a researcher’s already-public scholarly record relies on **legitimate interest** (GDPR Art. 6(1)(f)), with every field used already public in OpenAlex or ORCID and removal available on request; research logging relies on **explicit consent** (Art. 6(1)(a), and Art. 9 where any special-category data could be implicated).

**Controller and data-subject requests.** The data controller is the author (B. Chrétien) as the natural person operating the service; this is stated as the current arrangement rather than as an institutional commitment, and the author may institutionalize the service later. At this scale an individual controller has no formal data protection officer, so data-subject requests, including removal of an assembled public record, are handled directly by the author.

**Processing the records of non-users.** The legitimate-interest basis (GDPR Art. 6(1)(f)) covers the public records of researchers who are not users, namely co-authors and the name-collision subjects of Section 2. The four elements of the assessment are: the purpose is assembling an individual’s own scholarly record and conducting a public-data measurement; the processing is necessary to that purpose; every field used is already public in OpenAlex or ORCID; and any researcher who appears may request removal. Article 9 applies where any special-category data could be implicated.

**Retention.** The CV object and any published page are retained until the user deletes their account; research events are erasable on withdrawal of research consent.

**De-identified research export.** The export pseudonymizes subjects with a keyed hash-based message authentication code (HMAC), emits only pre-registered event types, and produces the re-identification key table separately; the key table is held by a designated personal-information manager and is never given to the analyst.
